# Supplementary material for: Intracranial Carotid Artery Calcification and Effect of Endovascular Stroke Treatment: MR CLEAN Subgroup Analysis
Source: PubMed Central journal article supplement — Stroke. 2018 Nov 9;49(12):2961–8. doi: 10.1161/STROKEAHA.118.022400 (PMC6257510; doi:10.1161/strokeaha.118.022400), 2018-11-09
Supplement: str-49-2961-s001.pdf [file str-49-2961-s001.pdf]

## **SUPPLEMENTAL MATERIAL**

- Suppl. Table I
- Suppl. Table II
- Suppl. Table III
- Suppl. Table IV
- Appendix (list of MR CLEAN investigators)

**Suppl. Table I.** Characteristics of analysed and patients in the MR CLEAN trial

|                                                                                  | <b>Analysed patients<br/>(n=344)</b> | <b>MR CLEAN patients<br/>(n=500)</b> | <b>p</b> |
|----------------------------------------------------------------------------------|--------------------------------------|--------------------------------------|----------|
| <b>Allocation to intervention group (%)</b>                                      | 156 (45.3)                           | 233 (46.6)                           | 0.22     |
| <b>Age (median [IQR])</b>                                                        | 66 [56-76]                           | 66 [56-76]                           | 0.64     |
| <b>Sex (male) (%)</b>                                                            | 204 (59.3)                           | 292 (58.4)                           | 0.85     |
| <b>NIHSS at baseline (median [IQR])</b>                                          | 18 [14-22]                           | 18 [14-22]                           | 0.83     |
| <b>Previous stroke (%)</b>                                                       | 41 (11.9)                            | 54 (10.8)                            | 0.69     |
| <b>Atrial fibrillation (%)</b>                                                   | 92 (26.7)                            | 135 (27.0)                           | 1        |
| <b>Diabetes mellitus (%)</b>                                                     | 48 (14.0)                            | 68 (13.6)                            | 0.96     |
| <b>Smoking (%)</b>                                                               | 101 (29.4)                           | 143 (28.6)                           | 0.87     |
| <b>Myocardial infarction (%)</b>                                                 | 56 (16.3)                            | 76 (15.0)                            | 0.74     |
| <b>Hypertension (%)</b>                                                          | 149 (43.3)                           | 227 (45.4)                           | 0.60     |
| <b>Pre-stroke mRS <math>\leq</math>2 (%)</b>                                     | 312 (90.7)                           | 479 (95.8)                           | 1        |
| <b>Systolic blood pressure at baseline (mmHg)<br/>(median [IQR])</b>             | 143 [130-160]                        | 143 [130-160]                        | 0.88     |
| <b>Treatment with IV alteplase</b>                                               | 304 (88.4)                           | 445 (89.0)                           | 0.86     |
| <b>ASPECTS <math>\geq</math>8 at baseline (%)</b>                                | 269 (78.9)                           | 373 (74.6)                           | 0.25     |
| <b>Location of intracranial occlusion (%)</b>                                    |                                      |                                      | 0.80     |
| ICA                                                                              | 4 (1.2)                              | 4 (0.8)                              |          |
| ICA-T                                                                            | 90 (26.2)                            | 134 (26.9)                           |          |
| M1                                                                               | 213 (61.9)                           | 319 (63.9)                           |          |
| M2                                                                               | 34 (9.9)                             | 39 (7.8)                             |          |
| A1 or A2                                                                         | 3 (0.9)                              | 3 (0.6)                              |          |
| <b>Collateral status on baseline CTA (%)</b>                                     |                                      |                                      | 1        |
| Absent collaterals                                                               | 19 (5.6)                             | 26 (5.2)                             |          |
| Poor collaterals                                                                 | 94 (27.7)                            | 136 (27.2)                           |          |
| Moderate collaterals                                                             | 134 (39.5)                           | 198 (39.6)                           |          |
| Good collaterals                                                                 | 92 (27.1)                            | 133 (26.6)                           |          |
| <b>Extracranial ICA<math>&gt;</math>50% stenosis at<br/>symptomatic side (%)</b> | 40 (11.6)                            | 57 (11.4)                            | 1        |
| <b>Extracranial ICA occlusion at symptomatic<br/>side (%)</b>                    | 25 (7.3)                             | 39 (7.8)                             | 0.88     |
| <b>Time from stroke onset to randomization<br/>(minutes) (median [IQR])</b>      | 189[145-248]                         | 200 [150-261]                        | 0.08     |

**Suppl. Table II.** Characteristics of patients according pattern of intracranial carotid artery calcification

|                                                                  | <b>Intimal dominance<br/>(n=118)</b> | <b>Medial dominance<br/>(n=152)</b> | <b>p</b> |
|------------------------------------------------------------------|--------------------------------------|-------------------------------------|----------|
| <b>Allocated to intervention group</b>                           | 57 (48.3)                            | 65 (42.8)                           | 0.433    |
| <b>Age(median [IQR])</b>                                         | 63 [54-70]                           | 76 [66-80]                          | <0.001   |
| <b>Sex (male) (%)</b>                                            | 81 (68.6)                            | 81 (53.3)                           | 0.015    |
| <b>NIHSS at baseline (median [IQR])</b>                          | 18[15-21]                            | 18[14-22]                           | 0.330    |
| <b>Previous stroke (%)</b>                                       | 11 (9.3)                             | 22 (14.5)                           | 0.274    |
| <b>Atrial fibrillation (%)</b>                                   | 28 (23.7)                            | 56 (36.8)                           | 0.030    |
| <b>Diabetes mellitus (%)</b>                                     | 12 (10.2)                            | 31 (20.4)                           | 0.035    |
| <b>Smoking (%)</b>                                               | 42 (35.6)                            | 35 (23.0)                           | 0.033    |
| <b>Myocardial infarction (%)</b>                                 | 11 (9.3)                             | 40 (26.3)                           | 0.001    |
| <b>Hypertension (%)</b>                                          | 43 (36.4)                            | 88 (57.9)                           | <0.001   |
| <b>Pre-stroke mRS ≤2 (%)</b>                                     | 112 (94.9)                           | 130 (85.5)                          | 0.021    |
| <b>Systolic blood pressure at baseline (mmHg) (median [IQR])</b> | 140 [128-155]                        | 152 [135-166]                       | <0.001   |
| <b>Treatment with IV alteplase</b>                               | 107 (90.7)                           | 128 (84.2)                          | 0.087    |
| <b>ASPECTS ≥8 at baseline (%) *</b>                              | 90 (76.9)                            | 121 (79.6)                          | 0.703    |
| <b>Location of intracranial occlusion (%)</b>                    |                                      |                                     | 0.366    |
| ICA                                                              | 1 (0.8)                              | 3 (2.0)                             |          |
| ICA-T                                                            | 35 (29.7)                            | 33 (21.7)                           |          |
| M1                                                               | 67 (56.8)                            | 99 (65.1)                           |          |
| M2                                                               | 14 (11.9)                            | 17 (11.2)                           |          |
| A1 or A2                                                         | 1 (0.8)                              | 0                                   |          |
| <b>Collateral status on baseline CTA(%) †</b>                    |                                      |                                     | 0.038    |
| Absent collaterals                                               | 6 (5.2)                              | 10 (6.6)                            |          |
| Poor collaterals                                                 | 24 (20.7)                            | 53 (35.1)                           |          |
| Moderate collaterals                                             | 56 (48.3)                            | 51 (33.8)                           |          |
| Good collaterals                                                 | 30 (25.9)                            | 37 (24.5)                           |          |
| <b>Extracranial ICA&gt;50% stenosis at symptomatic side</b>      | 11 (9.3)                             | 24 (15.8)                           | 0.166    |
| <b>Extracranial ICA occlusion at symptomatic side</b>            | 14 (11.9)                            | 8 (5.3)                             | 0.081    |
| <b>Time from stroke onset to randomization ‡</b>                 | 195 [148-268]                        | 186 [146-239]                       | 0.294    |
| <b>Recanalization status on follow up CTA (%) §</b>              |                                      |                                     | 0.622    |
| No recanalization                                                | 20 (20.2)                            | 29 (27.1)                           |          |
| Incomplete recanalization, no distal contrast                    | 4 (4.0)                              | 4 (3.7)                             |          |
| Incomplete recanalization but any distal contrast                | 13 (13.1)                            | 10 (9.3)                            |          |
| Complete recanalization                                          | 62 (62.6)                            | 64 (59.8)                           |          |
| <b>Follow-up (5-7 days) infarct volume (mL) (median [IQR]   </b> | 65 [26-115]                          | 83 [30-161]                         | 0.083    |

\* Alberta Stroke Program Early Computed Tomography Score (ASPECTS) was missing for three patients (1%).

† Data was missing for 5 (1%) patients.

‡ Data was missing for 3 (1%) patients.

§ Data was missing for 64 (19%) patients of which 28 patients died.

|| Data on follow-up infarct volume on NCCT 5-7 days was missing for 24 patients (9%) of which 8 patients died before assessment.

**Suppl. Table III.** Proportions of functional independence stratified by reperfusion grades in EVT-treated patients

| mTICI-score *      | EVT-patients with<br>intimal ICAC<br>(n=57) |             | EVT-patients with<br>medial ICAC<br>(n=65) |             |
|--------------------|---------------------------------------------|-------------|--------------------------------------------|-------------|
|                    | N (%)                                       | mRS 0-2 (%) | N (%)                                      | mRS 0-2 (%) |
| 0-1                | 9 (19)                                      | 0/9         | 9 (17)                                     | 1/9 (11)    |
| 2a                 | 13 (27)                                     | 2/13 (15)   | 11 (21)                                    | 3/11 (27)   |
| 2b-3               | 26 (54)                                     | 10/26 (38)  | 32 (62)                                    | 13/32 (40)  |
| <i>cOR (95%CI)</i> | <i>1.03 (0.89-1.18)</i>                     |             | <i>1.21 (1.07-1.38)</i>                    |             |

\*Score of 0 indicates no perfusion or anterograde flow beyond occlusion site, 1: penetration of contrast but not perfusion, 2A: some perfusion <50% of vascular territory, 2B: substantial perfusion ≥50, 3: complete perfusion of vascular territory.

To assess impact of reperfusion on functional outcome with ordinal logistic regression, complete scale of dependent (mRS) and independent (mTICI-score) variables were used.

**Suppl. Table IV.** Serious adverse events according pattern of intracranial carotid artery calcification for both treatment groups.

|                                       | Patient with intimal calcification pattern |                      | Patient with medial calcification pattern |                      |
|---------------------------------------|--------------------------------------------|----------------------|-------------------------------------------|----------------------|
|                                       | Intervention group (n=57)                  | Control group (n=61) | Intervention group (n=65)                 | Control group (n=87) |
| <b>Any serious adverse event *</b>    | 26 (46%)                                   | 17 (28%)             | 33 (51%)                                  | 44 (51%)             |
| Symptomatic intracerebral haemorrhage | 0                                          | 4 (7%)               | 5 (8%)                                    | 7 (8%)               |
| Recurrent ischemic stroke             | 2 (4%)                                     | 0                    | 5 (8%)                                    | 0                    |
| Progression of ischemic stroke        | 14 (25%)                                   | 10 (16%)             | 13 (20%)                                  | 14 (16%)             |
| Pneumonia                             | 6 (11%)                                    | 4 (6%)               | 11 (17%)                                  | 23 (26%)             |
| Cardiac ischemia                      | 1 (2%)                                     | 1 (2%)               | 0                                         | 3 (3%)               |
| Extracranial haemorrhage              | 0                                          | 0                    | 0                                         | 1 (1%)               |
| Allergic complication                 | 1 (2%)                                     | 0                    | 0                                         | 0                    |
| Other complication                    | 9 (16%)                                    | 5 (8%)               | 3 (5%)                                    | 16 (18%)             |

\* Only first events of one type are listed. Patients experiencing multiple events of one type have been counted once.

## Appendix

### MR CLEAN investigators

#### Executive Committee

Diederik W.J. Dippel (Department of Neurology, Erasmus MC University Medical Center); Aad van der Lugt (Radiology, Erasmus MC University Medical Center); Charles B.L.M. Majoie (Department of Radiology, Academic Medical Center, Amsterdam); Yvo B.W.E.M. Roos (Neurology, Academic Medical Center, Amsterdam); Robert J. van Oostenbrugge (Department of Neurology, Maastricht University Medical Center and Cardiovascular Research Institute Maastricht (CARIM)); Wim H. van Zwam (Radiology, Maastricht University Medical Center and Cardiovascular Research Institute Maastricht (CARIM)); Olvert A. Berkhemer (Department of Neurology, Erasmus MC University Medical Center; Department of Radiology, Academic Medical Center, Amsterdam); Puck S.S. Fransen (Department of Neurology and Radiology, Erasmus MC University Medical Center); Debbie Beumer (Department of Neurology, Erasmus MC University Medical Center; Department of Neurology, Maastricht University Medical Center and Cardiovascular Research Institute Maastricht (CARIM), the Netherlands); Lucie A. van den Berg (Neurology, Academic Medical Center, Amsterdam)

#### Local Principal Investigators

Wouter J. Schonewille (Department of Neurology, Sint Antonius Hospital, Nieuwegein, the Netherlands); Jan Albert Vos (Radiology, Sint Antonius Hospital, Nieuwegein, the Netherlands); Charles B.L.M. Majoie (Department of Radiology, Academic Medical Center, Amsterdam, the Netherlands); Yvo B.W.E.M. Roos (Neurology, Academic Medical Center, Amsterdam, the Netherlands); Paul J. Nederkoorn (Neurology, Academic Medical Center, Amsterdam, the Netherlands); Marieke J.H. Wermer (Department of Neurology, Leiden University Medical Center, the Netherlands); Marianne A.A. van Walderveen (Radiology, Leiden University Medical Center, the Netherlands); Robert J. van Oostenbrugge (Department of Neurology, Maastricht University Medical Center and Cardiovascular Research Institute Maastricht (CARIM), the Netherlands); Wim H. van Zwam (Radiology, Maastricht University Medical Center and Cardiovascular Research Institute Maastricht (CARIM), the Netherlands); Julie Staals (Department of Neurology, Maastricht University Medical Center and Cardiovascular Research Institute Maastricht (CARIM), the Netherlands); eannette Hofmeijer (Department of Neurology, Rijnstate Hospital, Arnhem, the Netherlands); Jacques A. van Oostayen (Radiology, Rijnstate Hospital, Arnhem, the Netherlands); Geert J. Lycklama à Nijeholt (Department of Radiology, MC Haaglanden, the Hague, the Netherlands); Jelis Boiten (Neurology, MC Haaglanden, the Hague, the Netherlands); Diederik W.J. Dippel (Department of Neurology, Erasmus MC University Medical Center, the Netherlands); Patrick A. Brouwer (Radiology, Erasmus MC University Medical Center, the Netherlands); Bart J. Emmer (Radiology, Erasmus MC University Medical Center, the Netherlands); Sebastiaan F. de Bruijn (Department of Neurology, HAGA Hospital, the Hague, the Netherlands); Lukas C. van Dijk (Radiology, HAGA Hospital, the Hague, the Netherlands); L. Jaap Kappelle (Department of Neurology, University Medical Center Utrecht, the Netherlands); Rob H. Lo (Radiology, University Medical Center Utrecht, the Netherlands); Ewoud J. van Dijk (Department of Neurology, Radboud University Medical Center, Nijmegen, the Netherlands); Joost de Vries (Neurosurgery, Radboud University

Medical Center, Nijmegen, the Netherlands); Paul L.M. de Kort (Department of Neurology, Sint Elisabeth Hospital, Tilburg, the Netherlands); Jan S.P. van den Berg (Department of Neurology, Isala Klinieken, Zwolle, the Netherlands); Willem Jan J. van Rooij (Department of Neurology, Isala Klinieken, Zwolle, the Netherlands); Boudewijn A.A.M. van Hasselt (Radiology, Isala Klinieken, Zwolle, the Netherlands); Leo A.M. Aerden (Department of Neurology, Reinier de Graaf Gasthuis, Delft, the Netherlands); René J. Dallinga (Radiology, Reinier de Graaf Gasthuis, Delft, the Netherlands); Marieke C. Visser (Department of Neurology, VU Medical Center, Amsterdam, the Netherlands); Joseph C.J. Bot (Radiology, VU Medical Center, Amsterdam, the Netherlands); Patrick C. Vroomen (Department of Neurology, University Medical Center Groningen, the Netherlands); Omid Eshghi (Radiology, University Medical Center Groningen, the Netherlands); Tobien H.C.M.L. Schreuder (Department of Neurology, Atrium Medical Center, Heerlen, the Netherlands); Roel J.J. Heijboer (Radiology, Atrium Medical Center, Heerlen, the Netherlands); Koos Keizer (Department of Neurology, Catharina Hospital, Eindhoven, the Netherlands); Alexander V. Tielbeek (Radiology, Catharina Hospital, Eindhoven, the Netherlands); Heleen M. den Hertog (Department of Neurology, Medical Spectrum Twente, Enschede, the Netherlands); Dick G. Gerrits (Radiology, Medical Spectrum Twente, Enschede, the Netherlands); Renske M. van den Berg-Vos (Department of Neurology, Sint Lucas Andreas Hospital, Amsterdam, the Netherlands); Giorgos B. Karas (Radiology, Sint Lucas Andreas Hospital, Amsterdam, the Netherlands)

#### Imaging Assessment Committee

Charles B.L.M. Majoie (Chair, Department of Radiology, Academic Medical Center, Amsterdam, the Netherlands); Wim H. van Zwam (Radiology, Maastricht University Medical Center and Cardiovascular Research Institute Maastricht (CARIM), the Netherlands); Aad van der Lugt (Radiology, Erasmus MC University Medical Center, the Netherlands); Geert J. Lycklama à Nijeholt (Department of Radiology, MC Haaglanden, the Hague, the Netherlands); Marianne A.A. van Walderveen (Radiology, Leiden University Medical Center, the Netherlands); Joseph C.J. Bot (Radiology, VU Medical Center, Amsterdam, the Netherlands); Henk A. Marquering (Biomedical Engineering and Physics, Academic Medical Center, Amsterdam, the Netherlands); Ludo F. Beenen (Department of Radiology, Academic Medical Center, Amsterdam, the Netherlands); Marieke E.S. Sprengers (Department of Radiology, Academic Medical Center, Amsterdam, the Netherlands); Sjoerd F.M. Jenniskens (Radiology, Radboud University Medical Center, Nijmegen, the Netherlands); René van den Berg (Department of Radiology, Academic Medical Center, Amsterdam, the Netherlands); Olvert A. Berkhemer (Department of Neurology, Erasmus MC University Medical Center; Department of Radiology, Academic Medical Center, Amsterdam, the Netherlands); Albert J. Yoo (Department of Radiology, Texas Stroke Institute)

#### Outcome Assessment Committee

Yvo B.W.E.M. Roos (Chair, Neurology, Academic Medical Center, Amsterdam, the Netherlands); Peter J. Koudstaal (Department of Neurology, Erasmus MC University Medical Center, the Netherlands); Jelis Boiten (Department of Neurology, Radboud University Medical Center, Nijmegen, the Netherlands); Ewoud J. van Dijk (Department of Neurology, Radboud University Medical Center, Nijmegen, the Netherlands)

### Adverse Event Committee

Robert J. van Oostenbrugge (Chair, Department of Neurology, Maastricht University Medical Center and Cardiovascular Research Institute Maastricht (CARIM), the Netherlands); Marieke J.H. Wermer (Department of Neurology, Leiden University Medical Center, the Netherlands); H. Zwenneke Flach (Radiology, Isala Klinieken, Zwolle, the Netherlands)

### Trial Statisticians

Ewout W. Steyerberg (Public Health, Erasmus MC University Medical Center, the Netherlands; Medical Statistics and Bioinformatics, Leiden University Medical Center, the Netherlands); Hester F. Lingsma (Public Health, Erasmus MC University Medical Center, the Netherlands); Medical Statistics and Bioinformatics
